# Supplementary material for: Non-invasive imaging reveals conditions that impact distribution and persistence of cells after in vivo administration
Source: PubMed Central journal article supplement (PMC6264053; doi:10.1186/s13287-018-1076-x), 2018-11-28
Supplement: 13287_2018_1076_MOESM1_ESM.pdf [file 13287_2018_1076_MOESM1_ESM.pdf]

**Additional File 1.** Summary of registered clinical studies involving umbilical cord-derived MSCs.

| <b>Title</b>                                                                                                                                                | <b>Start Date</b> | <b>URL</b>                  |
|-------------------------------------------------------------------------------------------------------------------------------------------------------------|-------------------|-----------------------------|
| Pilot Study of Umbilical Cord Blood Transplantation in Adult Patient With Advanced Hematopoietic Malignancies                                               | Oct-02            | <a href="#">NCT00514722</a> |
| Safety and Efficacy Study of Umbilical Cord Blood-Driven Mesenchymal Stem Cells to Promote Engraftment of Unrelated Hematopoietic Stem Cell Transplantation | Aug-08            | <a href="#">NCT00823316</a> |
| Allogeneic Umbilical Cord Mesenchymal Stem Cell Transplantation for Type 1 Diabetes With Diabetic Ketoacidosis                                              | Jan-09            | <a href="#">NCT02763423</a> |
| Safety and Efficacy of Stem Cell Therapy in Patients With Autism                                                                                            | Mar-09            | <a href="#">NCT01343511</a> |
| Safety and Efficacy of Human Mesenchymal Stem Cells for Treatment of Liver Failure                                                                          | Mar-09            | <a href="#">NCT01218464</a> |
| Umbilical Cord Mesenchymal Stem Cells for Patients With Liver Cirrhosis                                                                                     | May-09            | <a href="#">NCT01220492</a> |
| Allogeneic Mesenchymal Stem Cell for Graft-Versus-Host Disease Treatment                                                                                    | Sep-09            | <a href="#">NCT00749164</a> |
| Mesenchymal Stem Cells Treat Liver Cirrhosis                                                                                                                | Oct-09            | <a href="#">NCT01233102</a> |
| Safety and Efficacy of Umbilical Cord Mesenchymal Stem Cell Therapy for Patients With Hereditary Ataxia                                                     | Jan-10            | <a href="#">NCT01360164</a> |
| Safety and Efficacy of Umbilical Cord Mesenchymal Stem Cell Therapy for Patients With Progressive Multiple Sclerosis and Neuromyelitis Optica               | Jan-10            | <a href="#">NCT01364246</a> |
| Safety and Efficacy Study of Umbilical Cord/Placenta-Derived Mesenchymal Stem Cells to Treat Myelodysplastic Syndromes                                      | May-10            | <a href="#">NCT01129739</a> |
| Intratracheal Umbilical Cord-derived Mesenchymal Stem Cells for Severe Bronchopulmonary Dysplasia                                                           | Jul-10            | <a href="#">NCT01207869</a> |
| Safety and Efficacy Study of Umbilical Cord/Placenta-Derived Mesenchymal Stem Cells to Treat Severe Aplastic Anemia                                         | Aug-10            | <a href="#">NCT01182662</a> |
| Stem Cell Therapy for Type 1 Diabetes Mellitus                                                                                                              | Aug-10            | <a href="#">NCT01143168</a> |
| Umbilical Cord Mesenchymal Stem Cells Infusion for Ulcerative Colitis                                                                                       | Sep-10            | <a href="#">NCT01221428</a> |
| Umbilical Cord Mesenchymal Stem Cells Infusion for Initial Type 1 Diabetes Mellitus                                                                         | Sep-10            | <a href="#">NCT01219465</a> |
| Umbilical Cord Mesenchymal Stem Cells Infusion Via Hepatic Artery in Cirrhosis Patients                                                                     | Oct-10            | <a href="#">NCT01224327</a> |
| Intramuscular Injection of Mesenchymal Stem Cell for Treatment of Children With Idiopathic Dilated Cardiomyopathy                                           | Oct-10            | <a href="#">NCT01219452</a> |
| Human Umbilical Cord Mesenchymal Stem Cells Transplantation for Patients With Decompensated Liver Cirrhosis                                                 | Oct-10            | <a href="#">NCT01342250</a> |
| Safety and Efficacy Study of Umbilical Cord/Placenta-Derived Mesenchymal Stem Cells to Treat Ankylosing Spondylitis (AS)                                    | Jan-11            | <a href="#">NCT01420432</a> |

|                                                                                                                                        |        |                             |
|----------------------------------------------------------------------------------------------------------------------------------------|--------|-----------------------------|
| Umbilical Cord Mesenchymal Stem Cells Injection for Diabetic Foot                                                                      | Jan-11 | <a href="#">NCT01216865</a> |
| Allogenic Stem Cell Therapy in Patients With Acute Burn                                                                                | Jul-11 | <a href="#">NCT01443689</a> |
| Safety and Efficacy Study of Umbilical Cord/Placenta-Derived Mesenchymal Stem Cells to Treat Type 2 Diabetes                           | Jul-11 | <a href="#">NCT01413035</a> |
| Safety and Efficacy of Umbilical Cord Mesenchymal Stem Cell Therapy for Patients With Duchenne Muscular Dystrophy                      | Oct-11 | <a href="#">NCT01610440</a> |
| Umbilical Cord Mesenchymal Stem Cells for Patients With Autoimmune Hepatitis                                                           | Oct-11 | <a href="#">NCT01661842</a> |
| Umbilical Cord Mesenchymal Stem Cells for Patients With Primary Biliary Cirrhosis                                                      | Oct-11 | <a href="#">NCT01662973</a> |
| A New Method to Treat Hereditary Cerebellar Ataxia - Umbilical Cord Mesenchymal Stem Cells Transplantation                             | Dec-11 | <a href="#">NCT01489267</a> |
| Umbilical Cord Derived Mesenchymal Stem Cells Transplantation for Active and Refractory Systemic Lupus Erythematosus                   | Jan-12 | <a href="#">NCT01741857</a> |
| Umbilical Cord Blood-derived Mesenchymal Stem Cells for the Treatment of Steroid-refractory Acute or Chronic Graft-versus-host-disease | Jan-12 | <a href="#">NCT01549665</a> |
| UC-MSCs Gel Treatment Difficult Healing of Skin Ulcers                                                                                 | Jan-12 | <a href="#">NCT02685722</a> |
| MSCs Source of Sweat Gland Cells of Large Area Skin Injury Patients Transplant of the Wound                                            | Jan-12 | <a href="#">NCT02669199</a> |
| Phase 2 Study of Human Umbilical Cord Derived Mesenchymal Stem Cell for the Treatment of Lupus Nephritis                               | Feb-12 | <a href="#">NCT01539902</a> |
| Human Mesenchymal Stem Cells Induce Liver Transplant Tolerance                                                                         | Feb-12 | <a href="#">NCT01690247</a> |
| Safety and Efficiency of Umbilical Cord-derived Mesenchymal Stem Cells(UC-MSC) in Patients With Alzheimer's Disease                    | Mar-12 | <a href="#">NCT01547689</a> |
| The Clinical Trial on the Use of Umbilical Cord Mesenchymal Stem Cells in Amyotrophic Lateral Sclerosis                                | Mar-12 | <a href="#">NCT01494480</a> |
| Stem Cell Therapy Combined Hormone Replacement Therapy in Patients With Premature Ovarian Failure                                      | Mar-12 | <a href="#">NCT01742533</a> |
| Umbilical Cord Mesenchymal Stem Cell Treatment for Crohn's Disease                                                                     | Jun-12 | <a href="#">NCT02445547</a> |
| Safety and Efficacy of Human Umbilical Cord Derived Mesenchymal Stem Cells for Treatment of HBV-related Liver Cirrhosis                | Sep-12 | <a href="#">NCT01728727</a> |
| Umbilical Cord Mesenchymal Stem Cells Transplantation Combined With Plasma Exchange for Patients With Liver Failure                    | Nov-12 | <a href="#">NCT01724398</a> |
| Safety and Efficacy of UC-MSC in Patients With Acute Severe Graft-versus-host Disease                                                  | Dec-12 | <a href="#">NCT01754454</a> |
| Randomized Clinical Trial of Intravenous Infusion Umbilical Cord Mesenchymal Stem Cells on Cardiopathy                                 | Dec-12 | <a href="#">NCT01739777</a> |
| Mesenchymal Stem Cells to Treat Type II Diabetes                                                                                       | Jan-13 | <a href="#">NCT02302599</a> |

|                                                                                                                          |        |                             |
|--------------------------------------------------------------------------------------------------------------------------|--------|-----------------------------|
| Umbilical Cord Mesenchymal Stem Cells for Immune Reconstitution in HIV-infected Patients                                 | Jan-13 | <a href="#">NCT01213186</a> |
| Safety and Efficacy Study of Umbilical Cord-Derived Mesenchymal Stem Cells for Rheumatoid Arthritis                      | Apr-13 | <a href="#">NCT01547091</a> |
| Safety and Efficacy of Diverse Mesenchymal Stem Cells Transplantation for Liver Failure                                  | Jul-13 | <a href="#">NCT01844063</a> |
| Umbilical Cord Derived Mesenchymal Stromal Cells For The Treatment of Severe Steroid-resistant Graft Versus Host Disease | Sep-13 | <a href="#">NCT02032446</a> |
| Umbilical Cord Derived Mesenchymal Stem Cells Therapy in Hypoxic Ischemic Encephalopathy                                 | Sep-13 | <a href="#">NCT01962233</a> |
| Umbilical Cord Tissue-derived Mesenchymal Stem Cells for Rheumatoid Arthritis                                            | Oct-13 | <a href="#">NCT01985464</a> |
| Umbilical Cord Derived Mesenchymal Stem Cells Therapy in Ischemic Cardiomyopathy                                         | Oct-13 | <a href="#">NCT01946048</a> |
| Treatment Protocol of Child SAA With the Injection of Umbilical Cord Derived Mesenchymal Stem Cells                      | Oct-13 | <a href="#">NCT02218437</a> |
| Efficacy of Umbilical Cord Mesenchymal Stem Cells in Duchenne Muscular Dystrophy                                         | Nov-13 | <a href="#">NCT02285673</a> |
| Safety and Feasibility Study of Mesenchymal Trophic Factor (MTF) for Treatment of Osteoarthritis                         | Dec-13 | <a href="#">NCT02003131</a> |
| Umbilical Cord Mesenchymal Stem Cells Transplantation to Patients With Spinal Cord Injury                                | Jan-14 | <a href="#">NCT02481440</a> |
| Feasibility Study of Human Umbilical Cord Tissue-Derived Mesenchymal Stem Cells in Patients With Multiple Sclerosis      | Jan-14 | <a href="#">NCT02034188</a> |
| Umbilical Cord Mesenchymal Stem Cells Injection for Diabetes Secondary Peripheral Arterial Disease                       | Feb-14 | <a href="#">NCT02287831</a> |
| Allogeneic Umbilical Cord Mesenchymal Stem Cell Therapy for Autism                                                       | Jul-14 | <a href="#">NCT02192749</a> |
| Safety and Feasibility Study of Intranasal Mesenchymal Trophic Factor (MTF) for Treatment of Asthma                      | Jul-14 | <a href="#">NCT02192736</a> |
| Mesenchymal Stem Cells Transplantation for Ischemic-type Biliary Lesions                                                 | Jul-14 | <a href="#">NCT02223897</a> |
| Allogenic Mesenchymal Stem Cell for Bone Defect or Non Union Fracture                                                    | Aug-14 | <a href="#">NCT02307435</a> |
| Allogeneic Human Umbilical Cord Mesenchymal Stem Cells for a Single Male Patient With Duchenne Muscular Dystrophy (DMD)  | Sep-14 | <a href="#">NCT02235844</a> |
| Clinical Study of Umbilical Cord Tissue Mesenchymal Stem Cells (UC-MSC) for Treatment of Osteoarthritis                  | Sep-14 | <a href="#">NCT02237846</a> |
| Safety and Feasibility Study of Cell Therapy in Treatment of Spinal Cord Injury                                          | Sep-14 | <a href="#">NCT02237547</a> |
| A Study on Radiation-induced Pulmonary Fibrosis Treated With Clinical Grade Umbilical Cord Mesenchymal Stem Cells        | Oct-14 | <a href="#">NCT02277145</a> |
| Treatment of Infertility by Collagen Scaffold Loaded With Umbilical Cord Derived Mesenchyma Stem Cells                   | Nov-14 | <a href="#">NCT02313415</a> |

|                                                                                                                                                  |        |                             |
|--------------------------------------------------------------------------------------------------------------------------------------------------|--------|-----------------------------|
| Human Umbilical Cord Mesenchymal Stem Cell Transplantation in Articular Cartilage Defect                                                         | Dec-14 | <a href="#">NCT02291926</a> |
| Human Umbilical Cord Stroma MSC in Myocardial Infarction                                                                                         | Feb-15 | <a href="#">NCT02323477</a> |
| A Study of Allogeneic Human UC-MSC and Liberation Therapy (When Associated With CCSVI) in Patients With RRMS                                     | Feb-15 | <a href="#">NCT02587715</a> |
| A Study of Allogeneic Human UC-MSC and Liberation Therapy (When Associated With CCSVI) in Patients With RRMS                                     | Feb-15 | <a href="#">NCT02418325</a> |
| Evaluation of the Safety and Potential Therapeutic Effects After Intravenous Transplantation of Cordstem-ST in Patients With Cerebral Infarction | Feb-15 | <a href="#">NCT02378974</a> |
| Human Umbilical Cord Mesenchymal Stem Cell in Cerebral Hemorrhage Sequela                                                                        | Mar-15 | <a href="#">NCT02283879</a> |
| Safety and Efficacy of UC-MSCs in Patients With Psoriasis Vulgaris                                                                               | Apr-15 | <a href="#">NCT02491658</a> |
| Human Umbilical-Cord-Derived Mesenchymal Stem Cell Therapy in Acute Lung Injury                                                                  | May-15 | <a href="#">NCT02444455</a> |
| Human Umbilical-Cord-Derived Mesenchymal Stem Cell Therapy in Ischemic Cardiomyopathy                                                            | May-15 | <a href="#">NCT02439541</a> |
| Human Umbilical-Cord-Derived Mesenchymal Stem Cell Therapy in Active Ulcerative Colitis                                                          | May-15 | <a href="#">NCT02442037</a> |
| Human Umbilical-Cord-Derived Mesenchymal Stem Cell Therapy in Paraquat Poisoning Induced Lung Injury                                             | May-15 | <a href="#">NCT02444858</a> |
| Efficacy of Stem Cell Therapy in Ambulatory and Non-ambulatory Children With Duchenne Muscular Dystrophy - Phase 1-2                             | Jun-15 | <a href="#">NCT02484560</a> |
| Collagen Scaffolds Loaded With HUCMSCs for the Improvement of Erectile Function in Men With Diabetes                                             | Sep-15 | <a href="#">NCT02579148</a> |
| Injectable Collagen Scaffold, Combined With HUC-MSCs for the Improvement of Erectile Function in Men With Diabetes                               | Sep-15 | <a href="#">NCT02745808</a> |
| Human Umbilical Cord-derived Mesenchymal Stem Cells With Injectable Collagen Scaffold Transplantation for Chronic Ischemic Cardiomyopathy        | Oct-15 | <a href="#">NCT02635464</a> |
| Transplantation of HUC-MSCs With Injectable Collagen Scaffold for POF                                                                            | Oct-15 | <a href="#">NCT02644447</a> |
| A Study to Assess Safety and Efficacy of Umbilical Cord-derived Mesenchymal Stromal Cells in Knee Osteoarthritis                                 | Dec-15 | <a href="#">NCT02580695</a> |
| Umbilical Cord Mesenchymal Stem Cells Infusion for Diabetes Related Vascular Complications                                                       | Jan-16 | <a href="#">NCT02834858</a> |
| Human Umbilical Cord-Mesenchymal Stem Cells for Rheumatoid Arthritis                                                                             | Jan-16 | <a href="#">NCT02643823</a> |
| A Study on Pneumoconiosis Treated With Whole-lung Lavage Combined With Mesenchymal Stem Cells                                                    | Jan-16 | <a href="#">NCT02668068</a> |
| Stem Cell Therapy Combined With NeuroRegen Scaffold in Patients With Erectile Dysfunction After Rectal Cancer Surgery                            | Jan-16 | <a href="#">NCT02648386</a> |
| Umbilical Cord Derived Mesenchymal Stem Cells Treatment in Ischemic Stroke                                                                       | Feb-16 | <a href="#">NCT02580019</a> |

|                                                                                                                          |        |                             |
|--------------------------------------------------------------------------------------------------------------------------|--------|-----------------------------|
| Human Umbilical Cord Mesenchymal Stem Cells (HUC-MSCs) Transplantation in Women With Primary Ovarian Insufficiency (POI) | Feb-16 | <a href="#">NCT03033277</a> |
| Human Umbilical Cord-Mesenchymal Stem Cells for Hepatic Cirrhosis                                                        | Mar-16 | <a href="#">NCT02652351</a> |
| Stem Cells for Treatment of Bronchopleural Fistula                                                                       | Apr-16 | <a href="#">NCT02961725</a> |
| Safety and Exploratory Efficacy Study of UCMSCs in Patients With Ischemic Heart Disease (SEESUPIHD)                      | May-16 | <a href="#">NCT02666391</a> |
| Injectable Collagen Scaffold Combined With HUC-MSCs Transplantation for Patients With Decompensated Cirrhosis            | May-16 | <a href="#">NCT02786017</a> |
| Safety and Exploratory Efficacy Study of Collagen Membrane With Mesenchymal Stem Cells in the Treatment of Skin Defects  | May-16 | <a href="#">NCT02672280</a> |
| Human Umbilical Cord-Mesenchymal Stem Cells for Pneumoconiosis                                                           | Jun-16 | <a href="#">NCT02790762</a> |
| UC-MSC Infusion for HBV-Related Acute-on-Chronic Liver Failure                                                           | Jun-16 | <a href="#">NCT02812121</a> |
| UCMSC Transplantation in the Treatment of Cartilage Damage                                                               | Jun-16 | <a href="#">NCT02776943</a> |
| MsciSLE: MSCs in SLE Trial                                                                                               | Jul-16 | <a href="#">NCT02633163</a> |
| Safety and Efficacy of Umbilical Cord Mesenchymal Stem Cell Local Intramuscular Injection for Treatment of Uterine Scars | Nov-16 | <a href="#">NCT02968459</a> |
| Collagen Membrane Combined With HUC-MSCs Transplantation in Patients With Nasal Septum Perforation                       | Nov-16 | <a href="#">NCT02947191</a> |
| Safety Study of Filler Agent Composed of Umbilical Cord Mesenchymal Stem Cells and Hyaluronic Acid                       | Dec-16 | <a href="#">NCT02698813</a> |
| Umbilical Cord Derived Mesenchymal Stem Cells Therapy in Aplastic Anemia                                                 | Jan-17 | <a href="#">NCT03055078</a> |
| Umbilical Cord Mesenchymal Stem Cells in Primary Sclerosing Cholangitis                                                  | Jan-17 | <a href="#">NCT03516006</a> |
| Phase I Mesenchymal Stem Cells for Systemic Lupus Erythematosus                                                          | Apr-17 | <a href="#">NCT03171194</a> |
| hCT-MSCs for Children With Autism Spectrum Disorder (ASD)                                                                | Jun-17 | <a href="#">NCT03099239</a> |
| A Single-arm,Phase IIa,Safety and Efficacy Trial of Selected MSCs in the Treatment of Patients With PSC & AiH            | Jun-17 | <a href="#">NCT02997878</a> |
| Human Umbilical Cord Mesenchymal Stem Cell Therapy for Cerebral Infarction Patients in Convalescent Period.              | Jul-17 | <a href="#">NCT03176498</a> |
| The Study of Heart Failure With Human Umbilical Cord Mesenchymal Stem Cells (hUC-MSC)                                    | Jul-17 | <a href="#">NCT03180450</a> |
| The Study of Early Stage Osteonecrosis of Femoral Head With Human Umbilical Cord Mesenchymal Stem Cells                  | Jul-17 | <a href="#">NCT03180463</a> |
| The Safety and Efficacy of Human Umbilical Cord Mesenchymal Stem Cells in the Treatment of Acute Cerebral Infarction     | Jul-17 | <a href="#">NCT03186456</a> |
| Research for Human Umbilical Cord Mesenchymal Stem Cells in the Treatment of Myelodysplastic Syndrome (MDS)              | Jul-17 | <a href="#">NCT03184935</a> |

|                                                                                                                                                                                                                                 |        |                             |
|---------------------------------------------------------------------------------------------------------------------------------------------------------------------------------------------------------------------------------|--------|-----------------------------|
| Umbilical Cord Derived Mesenchymal Stem Cells Therapy in Systemic Lupus Erythematosus                                                                                                                                           | Aug-17 | <a href="#">NCT03219801</a> |
| Allogenic Mesenchymal Stem Cells And Physical Therapy for MS Treatment                                                                                                                                                          | Sep-17 | <a href="#">NCT03326505</a> |
| Safety and Exploratory Efficacy Study of UCMSCs in Patients With Alzheimer's Disease                                                                                                                                            | Oct-17 | <a href="#">NCT02672306</a> |
| Safety of Umbilical Cord Mesenchymal Stem Cell Local Intramuscular Injection for Treatment of Uterine Scars                                                                                                                     | Nov-17 | <a href="#">NCT03181087</a> |
| Intrathecal Transplantation of UC-MSC in Patients With Late Stage of Chronic Spinal Cord Injury                                                                                                                                 | Jan-18 | <a href="#">NCT03505034</a> |
| Evaluating Safety and Efficacy of Mesenchymal Stem Cells From Umbilical Cord                                                                                                                                                    | Jan-18 | <a href="#">NCT03358654</a> |
| Intrathecal Transplantation of UC-MSC in Patients With Early Stage of Chronic Spinal Cord Injury                                                                                                                                | Jan-18 | <a href="#">NCT03521323</a> |
| Intrathecal Transplantation of UC-MSC in Patients With Sub-Acute Spinal Cord Injury                                                                                                                                             | Jan-18 | <a href="#">NCT03521336</a> |
| Umbilical Cord Mesenchymal Stem Cells Injection for Ocular Corneal Burn                                                                                                                                                         | Jan-18 | <a href="#">NCT03237442</a> |
| The Safety/Efficacy of Umbilical Cord Mesenchymal Stem Cell Therapy for Patients With Healing Poor After Uterus Injury                                                                                                          | Jan-18 | <a href="#">NCT03386708</a> |
| The Safety/Efficacy of Human Umbilical Cord Mesenchymal Stem Cells Therapy for Patients With Osteoarthritis                                                                                                                     | Jan-18 | <a href="#">NCT03383081</a> |
| The Maximum Tolerated Dose of Mesenchymal Stem Cells From Umbilical Cord                                                                                                                                                        | Jan-18 | <a href="#">NCT03357770</a> |
| Repair of Acute Respiratory Distress Syndrome by Stromal Cell Administration (REALIST)                                                                                                                                          | Mar-18 | <a href="#">NCT03042143</a> |
| Assesment the Reconstruction of Motor Circuits in Nerve Fiber Injuries After the Treatment of Umbilical Cord Mesenchymal Stem Cells With Blood Oxygen Level-dependent Drived Diffusion Tensor Imaging                           | Mar-18 | <a href="#">NCT03336996</a> |
| Transplantation of Umbilical Cord-derived Mesenchymal Stem Cells Via Different Routes                                                                                                                                           | Apr-18 | <a href="#">NCT03414697</a> |
| Intravenous Infusion of Umbilical Cord Tissue (UC) Derived Mesenchymal Stem Cells (MSCs) Versus Bone Marrow (BM) Derived MSCs to Evaluate Cytokine Suppression in Patients With Chronic Inflammation Due to Metabolic Syndrome. | Apr-18 | <a href="#">NCT03059355</a> |
| Clinical Trial of Umbilical Cord Mesenchymal Stem Cell Transfusion in Decompensated Liver Cirrhosis                                                                                                                             | Jun-18 | <a href="#">NCT03529136</a> |
| Clinical Study of Umbilical Cord Mesenchymal Stem Cells (UC- MSC) for Treatment of Knee Osteoarthritis                                                                                                                          | Oct-18 | <a href="#">NCT03166865</a> |
