# Supplementary material for: Non-invasive imaging reveals conditions that impact distribution and persistence of cells after in vivo administration
Source: PubMed Central journal article supplement (PMC6264053; doi:10.1186/s13287-018-1076-x), 2018-11-28
Supplement: 13287_2018_1076_MOESM5_ESM.pdf [file 13287_2018_1076_MOESM5_ESM.pdf]

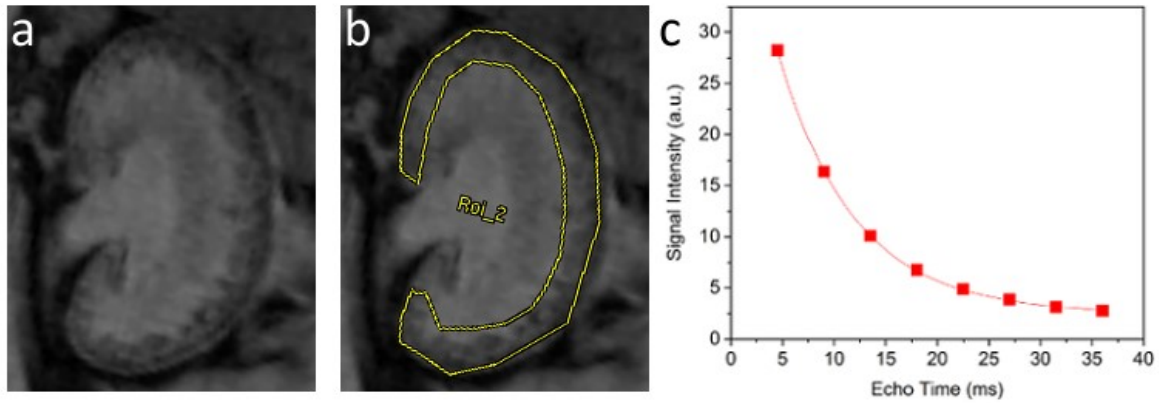

**Additional File 5. Placement of a region of interest (ROI) for the calculation of relaxation time in the kidney's cortex.** (a) *In vivo*  $T_2^*$ -weighted image of a single kidney post administration of SPION-labelled mMSCs, (b) placement of an ROI (yellow line) covering the cortex of the kidney where cell/SPION contrast is observed and (c) the changes in signal intensity as a function of echo time, with the solid line displaying the exponential fit of the data, from where the relaxation time is derived. Relaxation times were calculated with Paravision 6.0.1.
