# Supplementary material for: Non-invasive imaging reveals conditions that impact distribution and persistence of cells after in vivo administration
Source: PubMed Central journal article supplement (PMC6264053; doi:10.1186/s13287-018-1076-x), 2018-11-28
Supplement: 13287_2018_1076_MOESM6_ESM.pdf [file 13287_2018_1076_MOESM6_ESM.pdf]

**Additional File 6.** MRI sequences and acquisition parameters. All in vivo data was acquired with a 4-channel surface coil designed for the mouse brain or abdomen. Post mortem data was obtained with a 27 mm volume coil.

|                         | <i>In vivo</i>                   |                                |                     |                          |                               | <i>Post Mortem</i>              |
|-------------------------|----------------------------------|--------------------------------|---------------------|--------------------------|-------------------------------|---------------------------------|
|                         | FLASH T <sub>2</sub> * (Abdomen) | FLASH T <sub>2</sub> * (Brain) | B0 Map              | MGE T <sub>2</sub> * Map | RARE T <sub>2</sub> (Tumours) | FLASH T <sub>2</sub> * (Organs) |
| <b>Echo Time</b>        | 5.5 ms                           | 4.2 ms                         | 3.6 ms              | N/A                      | 25 ms                         | 6.3                             |
| <b>Repetition Time</b>  | 262.6 ms                         | 262.6 ms                       | 10 ms               | 900 ms                   | 2500 ms                       | 1300                            |
| <b>Flip Angle</b>       | 20.0°                            | 20.0°                          | 15.0°               | 50.0°                    | 90° excit.<br>180° refoc.     | 20°                             |
| <b>Matrix Size</b>      | 386 x 386 pixels                 | 256 x 256 pixels               | 64 x 64 x 64 pixels | 256 x 256 pixels         | 256 x 192 pixels              | 386 x 386 pixels                |
| <b>Field of View</b>    | 35 x 35 mm                       | 20 x 20 mm                     | 45 x 45 x 45mm      | 35 x 35 mm               | 40 x 30 mm                    | 15 x 15 mm                      |
| <b>Averages</b>         | 3                                | 3                              | 3                   | 2                        | 4                             | 24                              |
| <b>Slices</b>           | 20                               | 20                             | 1                   | 20                       | 30                            | 70                              |
| <b>Slice Thickness</b>  | 0.5 mm                           | 0.5 mm                         | 45 mm               | 0.5 mm                   | 1.0 mm                        | 0.2 mm                          |
| <b>Echo Images</b>      | N/A                              | N/A                            | N/A                 | 8                        | N/A                           | N/A                             |
| <b>Echo Spacing</b>     | N/A                              | N/A                            | N/A                 | 4.5ms, start at 4.5ms    | N/A                           | N/A                             |
| <b>Acquisition Time</b> | 5m 35s                           | 4m 4s                          | 2m 3s               | 5m 7s                    | 4m                            | 3h 20m 43s                      |
