# Supplementary material for: Non-invasive imaging reveals conditions that impact distribution and persistence of cells after in vivo administration
Source: PubMed Central journal article supplement (PMC6264053; doi:10.1186/s13287-018-1076-x), 2018-11-28
Supplement: 13287_2018_1076_MOESM8_ESM.pdf [file 13287_2018_1076_MOESM8_ESM.pdf]

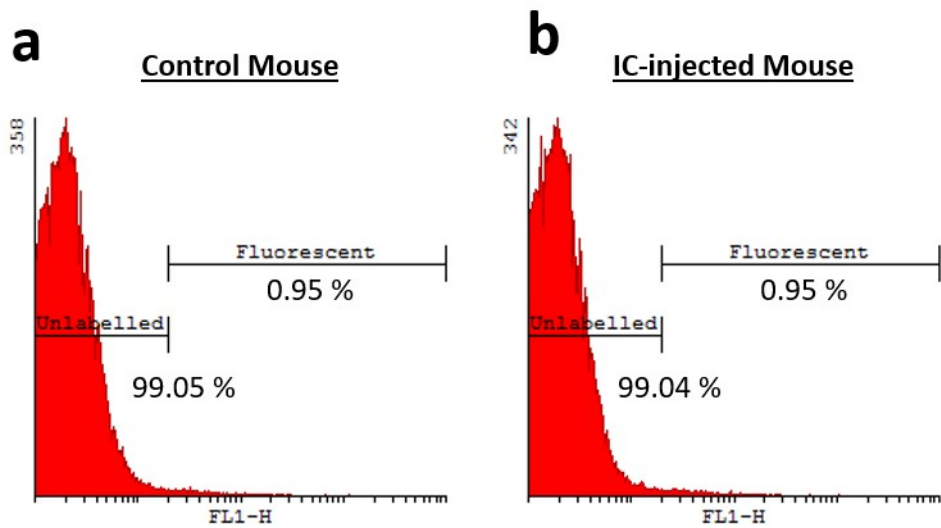

**Additional File 8. Fluorescence Activated Cell Sorting (FACS) analysis of bone marrow extracts.** Green fluorescence analysis of cells harvested from the femurs and tibias of **(a)** a control mouse that received no cells **(b)** a mouse that received mMSCs IC display no evidence of ZsGreen<sup>+</sup> cells in the bone marrow.
