# Supplementary material for: Non-invasive imaging reveals conditions that impact distribution and persistence of cells after in vivo administration
Source: PubMed Central journal article supplement (PMC6264053; doi:10.1186/s13287-018-1076-x), 2018-11-28
Supplement: 13287_2018_1076_MOESM9_ESM.pdf [file 13287_2018_1076_MOESM9_ESM.pdf]

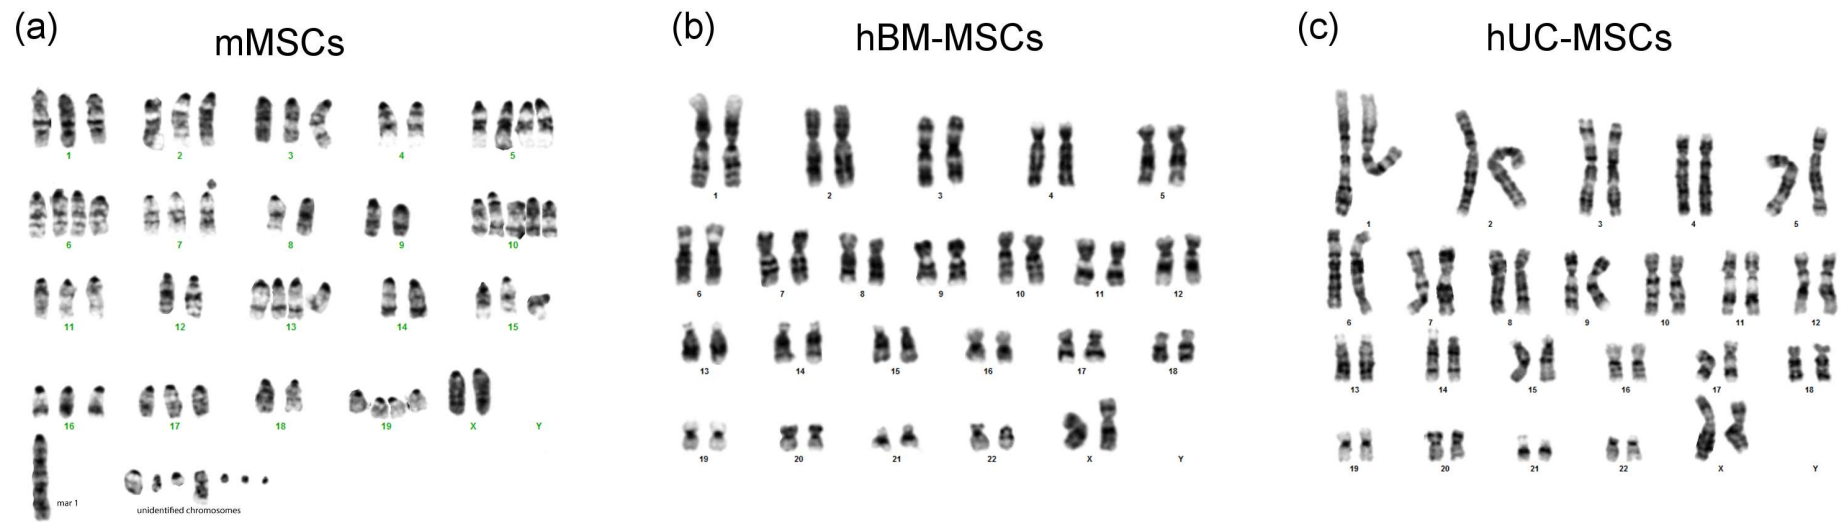

**Additional File 9. Chromosome analysis of the (a) mMSCs, (b) hBM-MSCs and (c) hUC-MSCs.** Whereas mMSCs displayed a grossly abnormal karyotype, the human cells displayed a normal female karyotype.
